# Supplementary material for: Clinical Effectiveness of Faecal Immunochemical Test in the Early Detection of Colorectal Cancer—An Umbrella Review
Source: MDPI journal article supplement (doi:10.3390/cancers14184391), 2022-09-09
Supplement: s1 [file s1]

## Search strategy Cochrane

| ID  | Keyword                                                                                                                                                                                                       | Result |
|-----|---------------------------------------------------------------------------------------------------------------------------------------------------------------------------------------------------------------|--------|
| #1  | MeSH descriptor: [Colonic Neoplasms] explode all trees                                                                                                                                                        | 1863   |
| #2  | MeSH descriptor: [Adenomatous Polyps] explode all trees                                                                                                                                                       | 259    |
| #3  | MeSH descriptor: [Colorectal Neoplasms] explode all trees                                                                                                                                                     | 9008   |
| #4  | #1 OR #2 OR #3                                                                                                                                                                                                | 9057   |
| #5  | ("colon cancer" OR "colorectal cancer" OR "adenomatous polyp*" OR "hereditary non-polyposis colorectal cancer" OR "familial adenomatous polyposis" OR "colonic neoplasia" OR "colorectal carcinoma"):ti,ab,kw | 17592  |
| #6  | #4 OR #5                                                                                                                                                                                                      | 20553  |
| #7  | ("fecal immunochemistry test"):ti,ab,kw                                                                                                                                                                       | 385    |
| #8  | (FIT):ti,ab,kw                                                                                                                                                                                                | 28016  |
| #9  | #7 OR #8                                                                                                                                                                                                      | 28071  |
| #10 | MeSH descriptor: [Mass Screening] explode all trees                                                                                                                                                           | 4058   |
| #11 | ("screen*"):ti,ab,kw                                                                                                                                                                                          | 83129  |
| #12 | #10 OR #11                                                                                                                                                                                                    | 83471  |
| #13 | #6 AND #9 AND #12                                                                                                                                                                                             | 487    |
| #14 | #6 AND #9 AND #12 in Cochrane Reviews, Publication Date 28.02.2012-28.02.2022                                                                                                                                 | 2      |

## Search strategy Medline (via PubMed)

| ID | Keyword                                                                                                                                                                                                                                                                                                                                                                                                                                        | Result |
|----|------------------------------------------------------------------------------------------------------------------------------------------------------------------------------------------------------------------------------------------------------------------------------------------------------------------------------------------------------------------------------------------------------------------------------------------------|--------|
| #1 | Search: Colonic Neoplasms[MeSH Terms]                                                                                                                                                                                                                                                                                                                                                                                                          | 79244  |
| #2 | Search: Adenomatous Polyps[MeSH Terms]                                                                                                                                                                                                                                                                                                                                                                                                         | 8463   |
| #3 | Search: Colorectal Neoplasms[MeSH Terms]                                                                                                                                                                                                                                                                                                                                                                                                       | 222256 |
| #4 | Search: (((Colonic Neoplasms[MeSH Terms]) OR (Adenomatous Polyps[MeSH Terms])) OR (Colorectal Neoplasms[MeSH Terms]))                                                                                                                                                                                                                                                                                                                          | 222891 |
| #5 | Search: "colon cancer"[Title/Abstract] OR "colorectal cancer"[Title/Abstract] OR "adenomatous polyp*" [Title/Abstract] OR "hereditary non-polyposis colorectal cancer"[Title/Abstract] OR "familial adenomatous polyposis"[Title/Abstract] OR "colonic neoplasia"[Title/Abstract] OR "colorectal carcinoma"[Title/Abstract]                                                                                                                    | 172125 |
| #6 | Search: (((Colonic Neoplasms[MeSH Terms]) OR (Adenomatous Polyps[MeSH Terms])) OR (Colorectal Neoplasms[MeSH Terms])) OR ("colon cancer"[Title/Abstract] OR "colorectal cancer"[Title/Abstract] OR "adenomatous polyp*" [Title/Abstract] OR "hereditary non-polyposis colorectal cancer"[Title/Abstract] OR "familial adenomatous polyposis"[Title/Abstract] OR "colonic neoplasia"[Title/Abstract] OR "colorectal carcinoma"[Title/Abstract]) | 275122 |
| #7 | Search: "fecal immunochemical test"[Title/Abstract]                                                                                                                                                                                                                                                                                                                                                                                            | 785    |
| #8 | Search: FIT[Title/Abstract]                                                                                                                                                                                                                                                                                                                                                                                                                    | 142712 |

|     |                                                                                                                                                                                                                                                                                                                                                                                                                                                                                                                                                                                                                                                                                                                                                                                                                               |        |
|-----|-------------------------------------------------------------------------------------------------------------------------------------------------------------------------------------------------------------------------------------------------------------------------------------------------------------------------------------------------------------------------------------------------------------------------------------------------------------------------------------------------------------------------------------------------------------------------------------------------------------------------------------------------------------------------------------------------------------------------------------------------------------------------------------------------------------------------------|--------|
| #9  | Search: ("fecal immunochemical test"[Title/Abstract]) OR (FIT[Title/Abstract])                                                                                                                                                                                                                                                                                                                                                                                                                                                                                                                                                                                                                                                                                                                                                | 142894 |
| #10 | Search: Mass Screening[MeSH Terms]                                                                                                                                                                                                                                                                                                                                                                                                                                                                                                                                                                                                                                                                                                                                                                                            | 139041 |
| #11 | Search: "screen*"[Title/Abstract]                                                                                                                                                                                                                                                                                                                                                                                                                                                                                                                                                                                                                                                                                                                                                                                             | 871234 |
| #12 | Search: (Mass Screening[MeSH Terms]) OR ("screen*"[Title/Abstract])                                                                                                                                                                                                                                                                                                                                                                                                                                                                                                                                                                                                                                                                                                                                                           | 913583 |
| #13 | Search: (((((Colonic Neoplasms[MeSH Terms]) OR (Adenomatous Polyps[MeSH Terms])) OR (Colorectal Neoplasms[MeSH Terms])) OR ("colon cancer"[Title/Abstract] OR "colorectal cancer"[Title/Abstract] OR "adenomatous polyp*"[Title/Abstract] OR "hereditary non-polyposis colorectal cancer"[Title/Abstract] OR "familial adenomatous polyposis"[Title/Abstract] OR "colonic neoplasia"[Title/Abstract] OR "colorectal carcinoma"[Title/Abstract])) AND (("fecal immunochemical test"[Title/Abstract]) OR (FIT[Title/Abstract]))) AND ((Mass Screening[MeSH Terms]) OR ("screen*"[Title/Abstract]))                                                                                                                                                                                                                              | 1388   |
| #14 | Search: (((((((systematic[Title]) AND ((Review[Title/Abstract]) OR "Review" [Publication Type]))))))                                                                                                                                                                                                                                                                                                                                                                                                                                                                                                                                                                                                                                                                                                                          | 187642 |
| #15 | Search: (((((((((metaanalysis[Title/Abstract]) OR Meta-Analysis[Title/Abstract]) OR "Meta-Analysis" [Publication Type]))))))                                                                                                                                                                                                                                                                                                                                                                                                                                                                                                                                                                                                                                                                                                  | 227965 |
| #16 | Search: (((((((((systematic[Title]) AND ((Review[Title/Abstract]) OR "Review" [Publication Type])))))) OR (((((((((metaanalysis[Title/Abstract]) OR Meta-Analysis[Title/Abstract]) OR "Meta-Analysis" [Publication Type]))))))                                                                                                                                                                                                                                                                                                                                                                                                                                                                                                                                                                                                | 326020 |
| #17 | Search: (((((((Colonic Neoplasms[MeSH Terms]) OR (Adenomatous Polyps[MeSH Terms])) OR (Colorectal Neoplasms[MeSH Terms])) OR ("colon cancer"[Title/Abstract] OR "colorectal cancer"[Title/Abstract] OR "adenomatous polyp*"[Title/Abstract] OR "hereditary non-polyposis colorectal cancer"[Title/Abstract] OR "familial adenomatous polyposis"[Title/Abstract] OR "colonic neoplasia"[Title/Abstract] OR "colorectal carcinoma"[Title/Abstract])) AND (("fecal immunochemical test"[Title/Abstract]) OR (FIT[Title/Abstract]))) AND ((Mass Screening[MeSH Terms]) OR ("screen*"[Title/Abstract])) AND (((((((((systematic[Title]) AND ((Review[Title/Abstract]) OR "Review" [Publication Type])))))) OR (((((((((metaanalysis[Title/Abstract]) OR Meta-Analysis[Title/Abstract]) OR "Meta-Analysis" [Publication Type])))))) | 67     |
| #18 | Search: (((((((Colonic Neoplasms[MeSH Terms]) OR (Adenomatous Polyps[MeSH Terms])) OR (Colorectal Neoplasms[MeSH Terms])) OR ("colon cancer"[Title/Abstract] OR "colorectal cancer"[Title/Abstract] OR "adenomatous polyp*"[Title/Abstract] OR "hereditary non-polyposis colorectal cancer"[Title/Abstract] OR "familial adenomatous polyposis"[Title/Abstract] OR "colonic neoplasia"[Title/Abstract] OR "colorectal carcinoma"[Title/Abstract])) AND (("fecal immunochemical test"[Title/Abstract]) OR (FIT[Title/Abstract]))) AND ((Mass Screening[MeSH Terms]) OR ("screen*"[Title/Abstract])) AND (((((((((systematic[Title]) AND ((Review[Title/Abstract]) OR "Review" [Publication Type])))))) OR (((((((((metaanalysis[Title/Abstract]) OR                                                                            | 63     |

|  |                                                                                                                               |  |
|--|-------------------------------------------------------------------------------------------------------------------------------|--|
|  | Meta-Analysis[Title/Abstract]) OR "Meta-Analysis" [Publication Type])])])])])])])])])])]) Filters: from 2012/2/28 - 2022/2/28 |  |
|--|-------------------------------------------------------------------------------------------------------------------------------|--|

### Search strategy Embase (via Ovid)

| ID | Keyword                                                                                                                                                                                                        | Result  |
|----|----------------------------------------------------------------------------------------------------------------------------------------------------------------------------------------------------------------|---------|
| 1  | exp colon tumor/                                                                                                                                                                                               | 343776  |
| 2  | exp adenomatous polyp/                                                                                                                                                                                         | 9513    |
| 3  | 1 or 2                                                                                                                                                                                                         | 347303  |
| 4  | ("colon cancer" or "colorectal cancer" or "adenomatous polyp*" or "hereditary non-polyposis colorectal cancer" or "familial adenomatous polyposis" or "colonic neoplasia" or "colorectal carcinoma").ab,kw,ti. | 249244  |
| 5  | 3 or 4                                                                                                                                                                                                         | 378472  |
| 6  | "fecal immunochemical test".ab,kw,ti.                                                                                                                                                                          | 1370    |
| 7  | FIT.ab,kw,ti.                                                                                                                                                                                                  | 171650  |
| 8  | exp occult blood test/                                                                                                                                                                                         | 6209    |
| 9  | 6 or 7 or 8                                                                                                                                                                                                    | 176706  |
| 10 | exp mass screening/                                                                                                                                                                                            | 265913  |
| 11 | "screen* ".ab,kw,ti.                                                                                                                                                                                           | 1170297 |
| 12 | 10 or 11                                                                                                                                                                                                       | 1273707 |
| 13 | 5 and 9 and 12                                                                                                                                                                                                 | 5379    |
| 14 | limit 13 to ((meta analysis or "systematic review") and yr="2012 - 2022")                                                                                                                                      | 176     |

# **List of studies included and excluded after full-text analysis**

| <b>Lp.</b> | <b>Authors, Title, Journal</b>                                                                                                                                                                                                                                                           | <b>Full text status</b> |
|------------|------------------------------------------------------------------------------------------------------------------------------------------------------------------------------------------------------------------------------------------------------------------------------------------|-------------------------|
| <b>1</b>   | <b>Katsoula, A. (2017). Diagnostic accuracy of fecal immunochemical test in patients at increased risk for colorectal cancer ameta-Analysis. JAMA Internal Medicine, 177, 1110-1118.</b>                                                                                                 | <b>Included</b>         |
| <b>2</b>   | <b>Zhang, J. (2017). Effectiveness of Screening Modalities in Colorectal Cancer: A Network Meta-Analysis. Clinical Colorectal Cancer, 16, 252-263.</b>                                                                                                                                   | <b>Included</b>         |
| <b>3</b>   | <b>Meklin, J. (2020). Fecal occult blood tests in colorectal cancer screening: Systematic review and meta-analysis of traditional and new-generation fecal immunochemical tests. Anticancer Research, 40, 3591-3604.</b>                                                                 | <b>Included</b>         |
| <b>4</b>   | <b>Gini, A., Jansen, E. E. L., Zielonke, N., Meester, R. G. S., Senore, C., Anttila, A. et al. (2020). Impact of colorectal cancer screening on cancer-specific mortality in Europe: A systematic review. Eur.J.Cancer, 127, 224-235.</b>                                                | <b>Included</b>         |
| <b>5</b>   | <b>Imperiale, T. F., Gruber, R. N., Stump, T. E., Emmett, T. W., &amp; Monahan, P. O. (2019). Performance Characteristics of Fecal Immunochemical Tests for Colorectal Cancer and Advanced Adenomatous Polyps: A Systematic Review and Meta-analysis. Ann.Intern.Med., 170, 319-329.</b> | <b>Included</b>         |
| <b>6</b>   | <b>Lin, J. S. (2021). Screening for Colorectal Cancer: Updated Evidence Report and Systematic Review for the US Preventive Services Task Force. JAMA - Journal of the American Medical Association, 325, 1978-1997.</b>                                                                  | <b>Included</b>         |
| <b>7</b>   | <b>Niedermaier, T. (2020). Stage-Specific Sensitivity of Fecal Immunochemical Tests for Detecting Colorectal Cancer: Systematic Review and Meta-Analysis. American Journal of Gastroenterology, 115, 56-69.</b>                                                                          | <b>Included</b>         |
| <b>8</b>   | <b>Stonestreet, J. (2019). Systematic review and meta-analysis: Diagnostic accuracy of faecal immuno-chemical testing for haemoglobin (FIT) in detecting colorectal cancer for both symptomatic and screening population. Acta Gastro-Enterologica Belgica, 82, 291-299.</b>             | <b>Included</b>         |
| <b>9</b>   | <b>Mutneja, H. R. (2021). Comparative effectiveness of fecal immunochemical tests versus flexible sigmoidoscopy for colorectal cancer screening: A systematic review and meta-analysis of randomized clinical trials. Journal of Gastrointestinal and Liver Diseases, 30, no.</b>        | <b>Included</b>         |

|    |                                                                                                                                                                                                                                                          |                 |
|----|----------------------------------------------------------------------------------------------------------------------------------------------------------------------------------------------------------------------------------------------------------|-----------------|
| 10 | <b>Mutneja H. R., Bhurwal A., Arora S. et al. (2021). A delay in colonoscopy after positive fecal tests leads to higher incidence of colorectal cancer: A systematic review and meta-analysis. J. Gastroenterol. Hepatol. 36(6): 1479-1486</b>           | <b>Included</b> |
| 11 | <b>Zhong G. C., Sun W. P., W. L. et al. (2020). Efficacy and cost-effectiveness of fecal immunochemical test versus colonoscopy in colorectal cancer screening: a systematic review and meta-analysis. Gastrointest. Endosc. 91(3): 684-697</b>          | <b>Included</b> |
| 12 | <b>Selby K., Levine E. H., Doan C. et al. (2019). Effect of Sex, Age and Positivity Threshold on Fecal Immunochemical Test Accuracy: a Systematic Review and Meta-Analysis. Gastroenterology. 157(6): 1494-1505</b>                                      | <b>Included</b> |
| 13 | <b>Forbes, N. &amp; Heitman, S. J. (2021). Association Between Time to Colonoscopy After Positive Fecal Testing and Colorectal Cancer Outcomes: A Systematic Review. Clinical Gastroenterology and Hepatology, 19, 1344-1354.</b>                        | <b>Included</b> |
| 14 | Iannone, A. (2016). Stool Investigations for Colorectal Cancer Screening: From Occult Blood Test to DNA Analysis. Journal of Gastrointestinal Cancer, 47, 143-151.                                                                                       | Excluded        |
| 15 | Gies, A. & Gies, A. (2018). Quantitative fecal immunochemical tests for colorectal cancer screening. International Journal of Cancer, 143, 234-244.                                                                                                      | Excluded        |
| 16 | Pickhardt, P. J. (2021). PPV and detection rate of mt-sDNA testing, FIT, and CT colonography for advanced neoplasia: A hierarchic Bayesian meta-analysis of the noninvasive colorectal screening tests. American Journal of Roentgenology, 217, 817-830. | Excluded        |
| 17 | Vieito, N. P. (2019). High-risk symptoms and quantitative faecal immunochemical test accuracy: Systematic review and meta-analysis. World Journal of Gastroenterology, 25, 2383-2401.                                                                    | Excluded        |
| 18 | Niedermaier, T. (2018). Fecal immunochemical tests in combination with blood tests for colorectal cancer and advanced adenoma detection-systematic review. United European Gastroenterology Journal, 6, 13-21.                                           | Excluded        |
| 19 | Niedermaier, T. (2016). Fecal Immunochemical Tests Combined with Other Stool Tests for Colorectal Cancer and Advanced Adenoma Detection: A Systematic Review. Clinical and Translational Gastroenterology, 7, no.                                        | Excluded        |

|    |                                                                                                                                                                                                                                                                                                                                               |          |
|----|-----------------------------------------------------------------------------------------------------------------------------------------------------------------------------------------------------------------------------------------------------------------------------------------------------------------------------------------------|----------|
| 20 | Rabeneck, L. (2012). Fecal immunochemical tests compared with guaiac fecal occult blood tests for population-based colorectal cancer screening. <i>Canadian Journal of Gastroenterology</i> , 26, 131-147.                                                                                                                                    | Excluded |
| 21 | GuimarÃŁes, D. P., Fregnani, J. H., Reis, R. M., Taveira, L. N., Scapulatempo-Neto, C., Matsushita, M. et al. (2019). Comparison of a New-generation Fecal Immunochemical Test (FIT) With Guaiac Fecal Occult Blood Test (gFOBT) in Detecting Colorectal Neoplasia Among Colonoscopy-referral Patients. <i>Anticancer Res.</i> , 39, 261-269. | Excluded |
| 22 | Jodal, H. C. (2019). Colorectal cancer screening with faecal testing, sigmoidoscopy or colonoscopy: A systematic review and network meta-analysis. <i>BMJ Open</i> , 9, no.                                                                                                                                                                   | Excluded |
| 23 | Lee, J. K. (2014). Accuracy of fecal immunochemical tests for colorectal cancer systematic review and meta-Analysis. <i>Annals of Internal Medicine</i> , 160, 171-181.                                                                                                                                                                       | Excluded |
| 24 | Vasilyev, S., Smirnova, E., Popov, D., Semenov, A., Eklund, C., Hendolin, P. et al. (2015). A New-Generation Fecal Immunochemical Test (FIT) Is Superior to Quaiac-based Test in Detecting Colorectal Neoplasia Among Colonoscopy Referral Patients. <i>Anticancer Res.</i> , 35, 2873-2880.                                                  | Excluded |

## AMSTAR2

The systematic reviews included in the analysis received the following ratings:

- high – Zhong 2020, Gini 2020, Selby 2019;
- low – Lin 2021, Forbes 2021, Meklin 2020, Imperiale 2019, Katsoula 2017;
- critically low – Mutneja 2021a, Mutneja 2021b, Niedermaier 2020, Stonestreet 2019, Zhang 2017.

**Table S1. AMSTAR 2 rating**

| Publication        | Item 2      | Item 4      | Item 7 | Item 9 | Item 11 | Item 13 | Item 15 | Overall rating |
|--------------------|-------------|-------------|--------|--------|---------|---------|---------|----------------|
| Lin 2021 (MA)      | Yes         | Yes         | No     | Yes    | Yes     | Yes     | Yes     | Low            |
| Mutneja 2021a (MA) | No          | Partial Yes | No     | Yes    | Yes     | Yes     | Yes     | Critically Low |
| Mutneja 2021b (MA) | No          | Partial Yes | No     | Yes    | Yes     | Yes     | Yes     | Critically Low |
| Forbes 2021 (SR)   | Partial Yes | Partial Yes | No     | Yes    | -       | Yes     | -       | Low            |
| Gini 2020 (SR)     | Yes         | Yes         | Yes    | Yes    | -       | Yes     | -       | High           |

| Publication           | Item 2      | Item 4      | Item 7      | Item 9 | Item 11 | Item 13 | Item 15 | Overall rating |
|-----------------------|-------------|-------------|-------------|--------|---------|---------|---------|----------------|
| Niedermaier 2020 (MA) | No          | Yes         | No          | Yes    | Yes     | Yes     | Yes     | Critically Low |
| Zhong 2020 (MA)       | Partial Yes | Yes         | Yes         | Yes    | Yes     | Yes     | Yes     | High           |
| Meklin 2020 (MA)      | Partial Yes | Partial Yes | No          | Yes    | Yes     | Yes     | Yes     | Low            |
| Imperiale 2019 (MA)   | Partial Yes | Partial Yes | No          | Yes    | Yes     | Yes     | Yes     | Low            |
| Selby 2019 (MA)       | Yes         | Yes         | Partial Yes | Yes    | Yes     | Yes     | Yes     | High           |
| Stonestreet 2019 (MA) | No          | No          | Partial Yes | Yes    | No      | Yes     | Yes     | Critically Low |
| Katsoula 2017 (MA)    | Yes         | Partial Yes | No          | Yes    | Yes     | Yes     | Yes     | Low            |
| Zhang 2017 (MA)       | No          | Partial Yes | No          | Yes    | Yes     | Yes     | Yes     | Critically Low |

MA – meta-analysis; SR – systematic review

*Critical domains: item 2 – protocol registered before commencement of the review; item 4 – adequacy of the literature search; item 7 – justification for excluding individual studies; item 9 – risk of bias from individual studies being included in the review; item 11 – appropriateness of meta-analytical methods; item 13 – consideration of risk of bias when interpreting the results of the review; item 15 – assessment of presence and likely impact of publication bias.*
